# Supplementary material for: Methotrexate upregulates circadian transcriptional factors PAR bZIP to induce apoptosis on rheumatoid arthritis synovial fibroblasts
Source: PubMed Central journal article supplement (PMC5863822; doi:10.1186/s13075-018-1552-9), 2018-03-22
Supplement: 13075_2018_1552_MOESM4_ESM.pdf [file 13075_2018_1552_MOESM4_ESM.pdf]

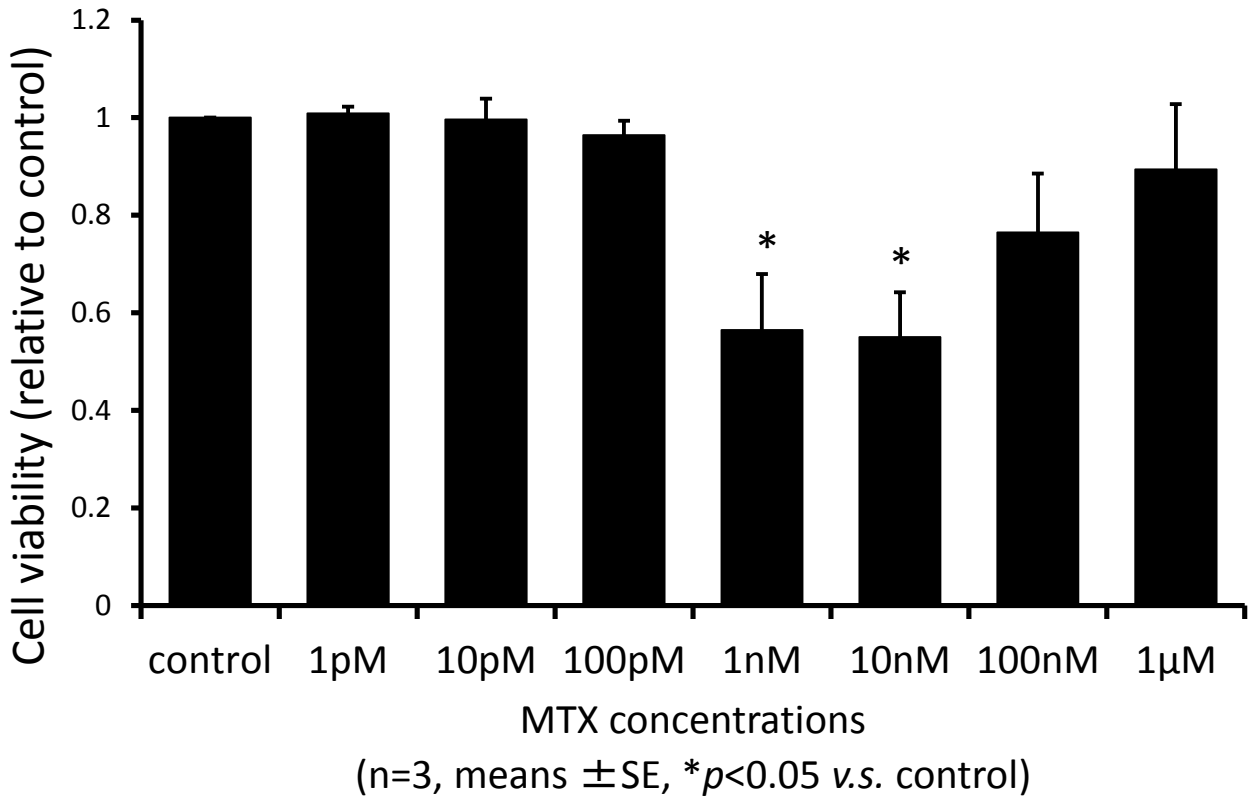

Additional file 4:

Cell viability of RA synovial fibroblasts was measured by WST-8 assay after 24 hrs' stimulation of MTX (1 pM to 1 µM).

1 and 10 nM of MTX significantly decreased the cell viability as shown in figure 1, while 1 to 100 pM of MTX didn't.
