# Supplementary material for: Methotrexate upregulates circadian transcriptional factors PAR bZIP to induce apoptosis on rheumatoid arthritis synovial fibroblasts
Source: Springer Nature journal article supplement (doi:10.1186/s13075-018-1552-9), 2018-03-22
Supplement: MOESM1 [file 15557184]

## Additional file 1

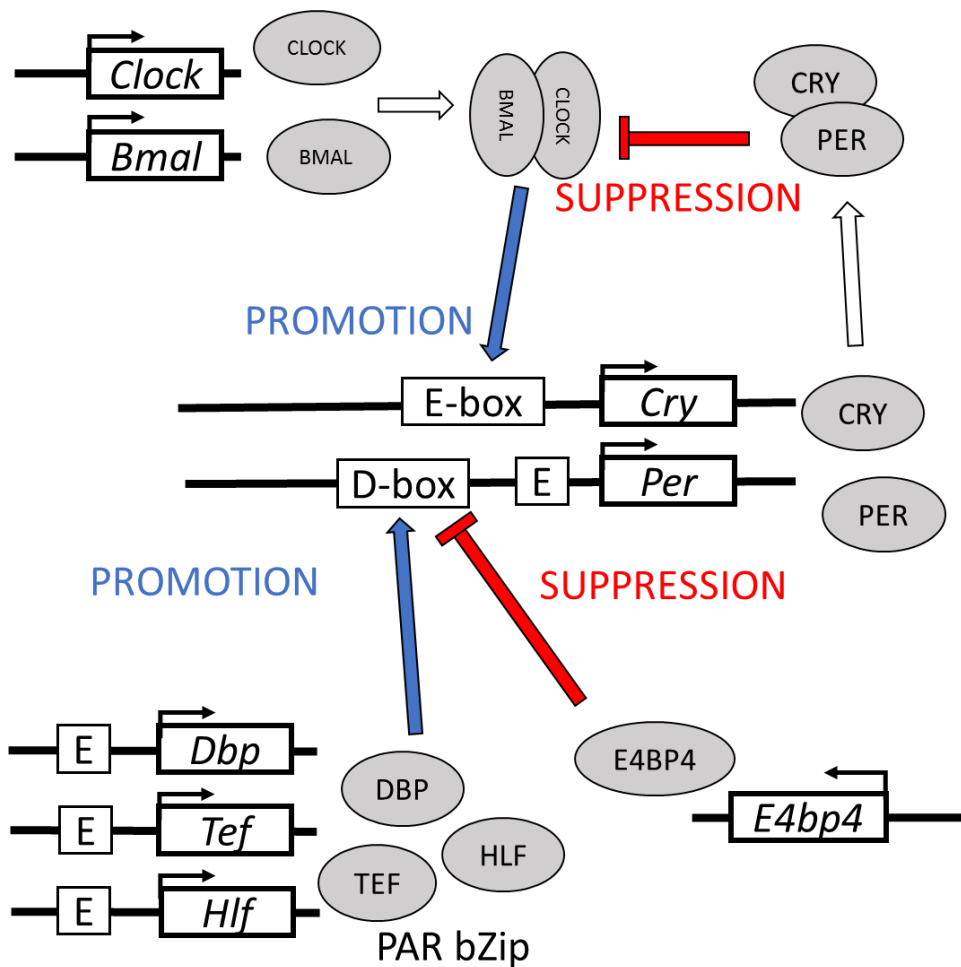

### Additional file 1 :

The interactions of circadian clock genes and its relative factors. BMAL/CLOCK and PER/CRY create the circadian rhythm *via* E-box, and DBP, TEF, HLF, E4BP4 *via* D-box.

BMAL and CLOCK heterodimerize and bind to the E-box elements on the promoter regions of *Per* and *Cry* genes to induce their transcription. Thereafter, PER and CRY proteins heterodimerize to inhibit the activities of their own and other E-box regulated promoters.
