# Supplementary material for: Methotrexate upregulates circadian transcriptional factors PAR bZIP to induce apoptosis on rheumatoid arthritis synovial fibroblasts
Source: Springer Nature journal article supplement (doi:10.1186/s13075-018-1552-9), 2018-03-22
Supplement: MOESM2 [file 15557184]

Additional Table

|             | age | sex | disease duration (yrs) | CRP (mg/dl) | DAS28-ESR | MTX (mg/w) | PSL (mg) | other DMARDs |
|-------------|-----|-----|------------------------|-------------|-----------|------------|----------|--------------|
| Patient #1  | 56  | F   | 19                     | 2.08        | 3.8       | 12         | 3        | none         |
| Patient #2  | 67  | F   | 32                     | 1.1         | 2.7       | 6          | 0        | ADA          |
| Patient #3  | 62  | F   | 21                     | 0.02        | 0.6       | 0          | 10       | Tac 2mg, TCZ |
| Patient #4  | 72  | F   | 24                     | 3.51        | 3.9       | 8          | 5        | IFX          |
| Patient #5  | 55  | F   | 12                     | 1.1         | 2.4       | 10         | 3        | Tac 1.5mg    |
| Patient #6  | 62  | M   | 26                     | 0.26        | 1.3       | 6          | 0        | ADA          |
| Patient #7  | 43  | F   | 8                      | 2.76        | 4.6       | 12         | 5        | ETN          |
| Patient #8  | 41  | F   | 15                     | 0.86        | 2.5       | 8          | 2.5      | ETN          |
| Patient #9  | 63  | F   | 28                     | 0.11        | 2.7       | 0          | 5        | TCZ          |
| Patient #10 | 72  | M   | 42                     | 0.32        | 1.6       | 12         | 3        | none         |

### Additional file 2 :

Detailed information of patients with RA, enrolled in this study.

Joint samples were obtained from 10 different patients to establish primary cultured synovial fibroblast cell lines.

Age, sex, disease duration, CRP, DAS28-ESR, and treatments with MTX, PSL, and other DMARDs were shown in the additional table.

MTX: Methotrexate, PSL: Methylprednisolone, DMARDs: disease modified anti-rheumatic drugs, ADA: Adalimumab, TCZ: Tocilizumab, Tac: Tacrolimus, ETN: Etanercept, IFX: Infliximab, ADA: Adalimumab.
