# Supplementary material for: Methotrexate upregulates circadian transcriptional factors PAR bZIP to induce apoptosis on rheumatoid arthritis synovial fibroblasts
Source: Springer Nature journal article supplement (doi:10.1186/s13075-018-1552-9), 2018-03-22
Supplement: MOESM3 [file 15557184]

## Additional file 3

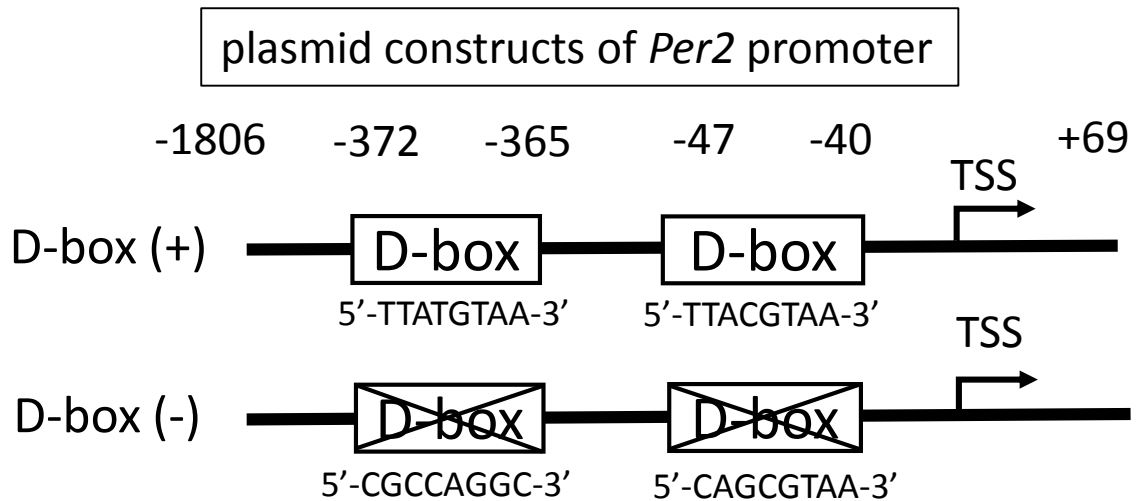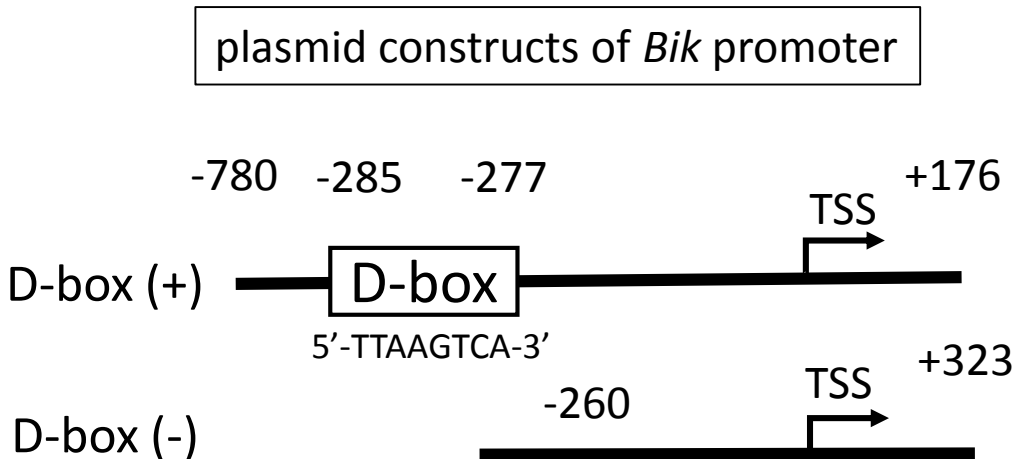

### Additional file 3 :

D-box (+); plasmid constructs containing D-box.

D-box (-); plasmid constructs without D-box.

D-box motifs of *Per2* promoter were mutated from 5'-TTATGTAA-3' to 5'-CGCCAGGC-3' (-372 to -365), and 5'-TTACGTAA-3' to 5'-CAGCGTAA-3' (-47 to -40).

Human *Bik* promoter containing D-box (-780 to +176) and human *Bik* promoter without D-box (-260 to +323) were constructed.
