# Supplementary material for: Methotrexate upregulates circadian transcriptional factors PAR bZIP to induce apoptosis on rheumatoid arthritis synovial fibroblasts
Source: Springer Nature journal article supplement (doi:10.1186/s13075-018-1552-9), 2018-03-22
Supplement: MOESM5 [file 15557184]

# Additional file 5

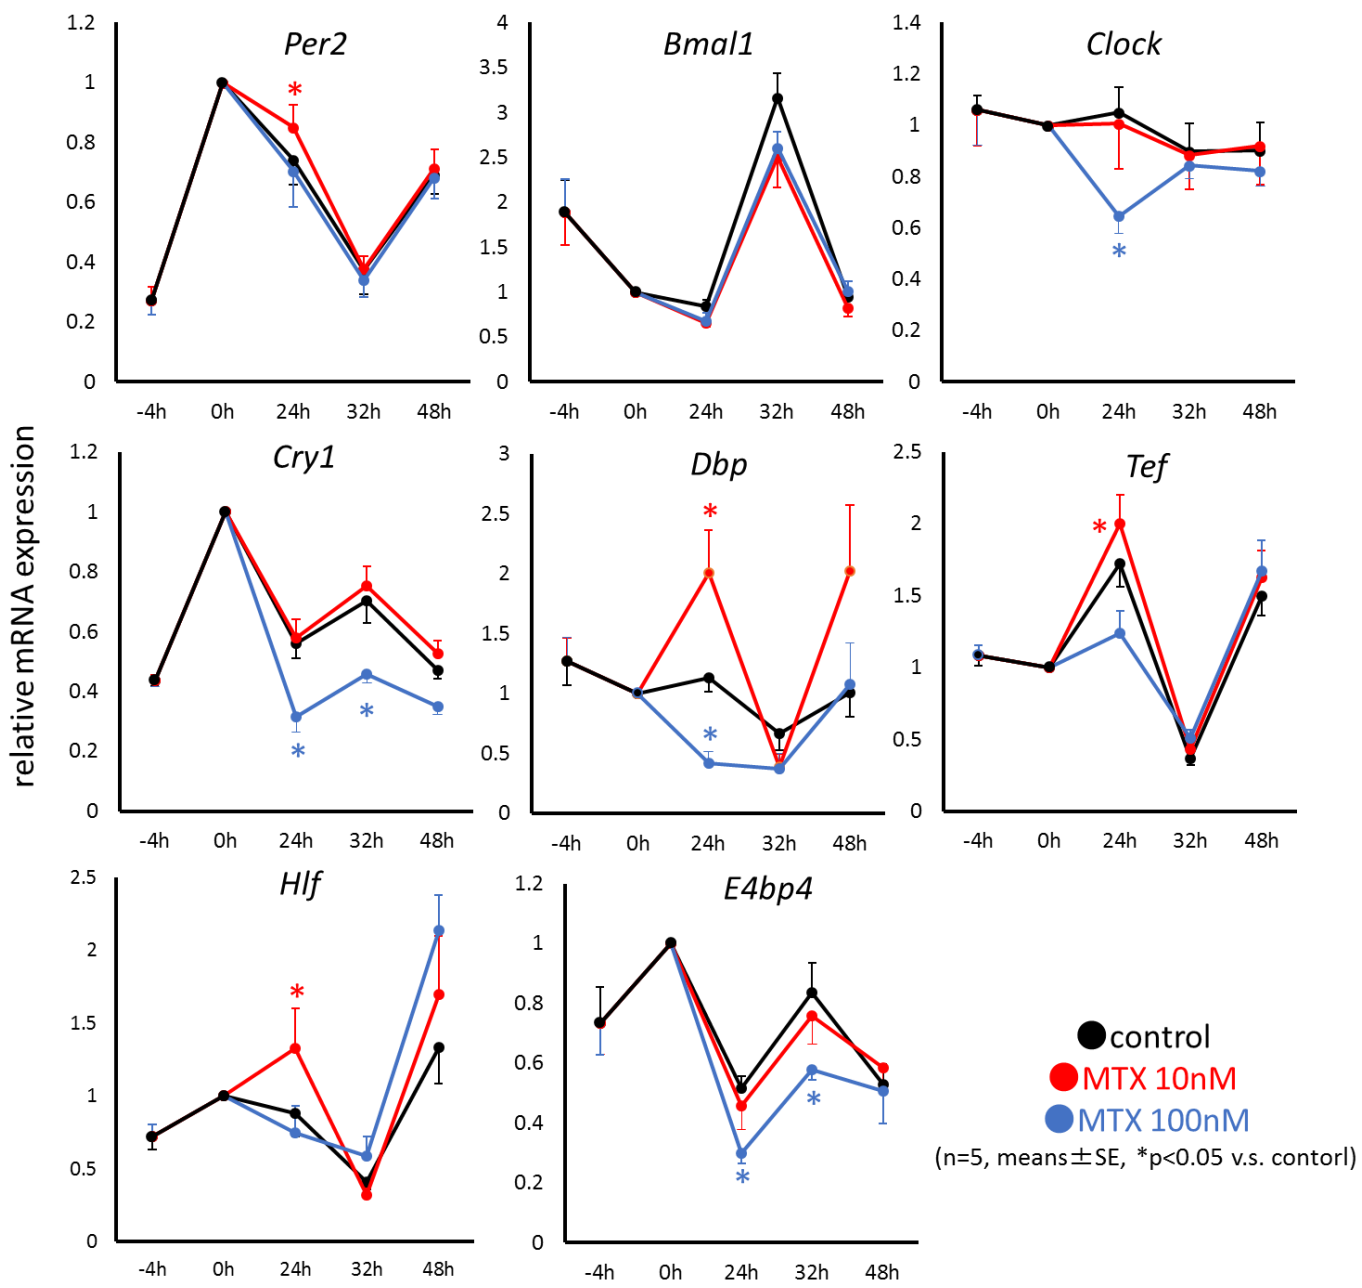

## Additional file 5:

The mRNA expression of circadian clock genes were measured at -4h (before synchronization), 0h (just before MTX stimulation), 24h, 32h, and 48h.

We found that the controls and 10/100nM of MTX showed almost same expression rhythms, and MTX has influenced only on their expression levels.
