# Supplementary material for: Methotrexate upregulates circadian transcriptional factors PAR bZIP to induce apoptosis on rheumatoid arthritis synovial fibroblasts
Source: Springer Nature journal article supplement (doi:10.1186/s13075-018-1552-9), 2018-03-22
Supplement: MOESM6 [file 15557184]

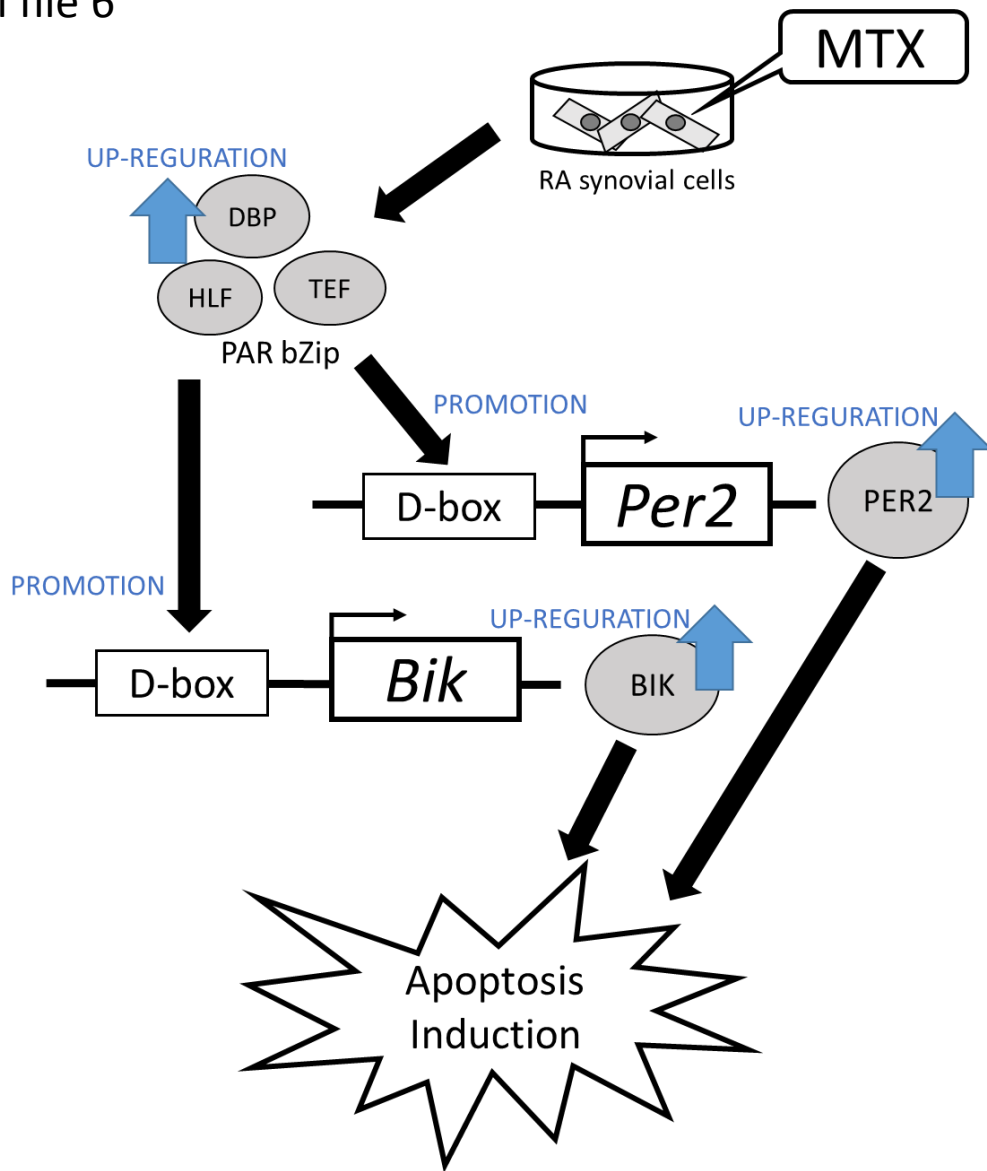

Additional file 6:

Two different transcriptional pathways that MTX induces apoptosis to synovial fibroblasts; PAR bZIP-Per2 transcriptional pathway and PAR bZIP-Bik transcriptional pathway.

We propose here that MTX induces apoptosis in synovial cells through activated binding of PAR bZIP to D-box in two different genes, *Per2* and *Bik*, and these dual pathways work independently, but synergistically.
